# Supplementary material
Source: Springer Nature journal article supplement (https://www.springermedizin.de/resource/supplementary/13017_2011_201_MOESM1_ESM.pdf/9635684)
Supplement: MOESM1 [file 9635684]

102 tetanus patients

```
graph TD; A[102 tetanus patients] --> B[58 (56.9%) patients alive]; A --> C[44 (43.1%) patients died]; B --> D[53 (91.4%) patients discharged well]; B --> E[5 (8.6%) patients with permanent disability];
```

58 (56.9%) patients alive

44 (43.1%) patients died

53 (91.4%) patients discharged well

5 (8.6%) patients with permanent disability
